# Supplementary material
Source: PubMed Central journal article supplement (PMC5114393)
Supplement: 10.1074_M116.720581_jbc.M116.720581-1.pdf [file 10.1074_M116.720581_jbc.M116.720581-1.pdf]

# Supplement data 1

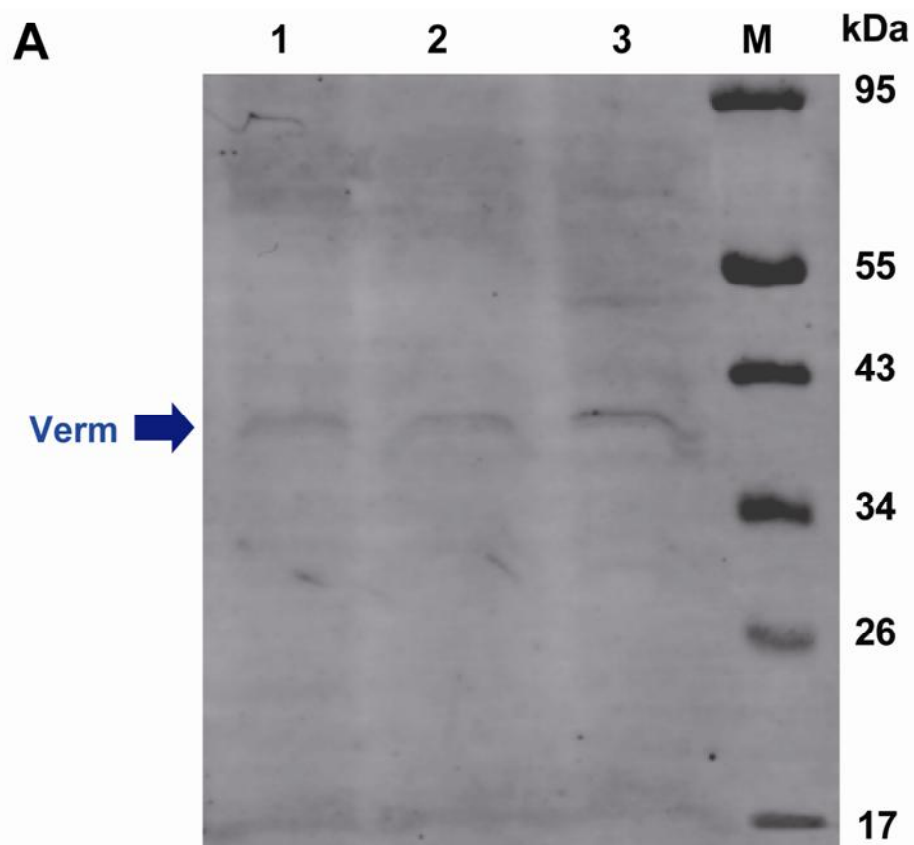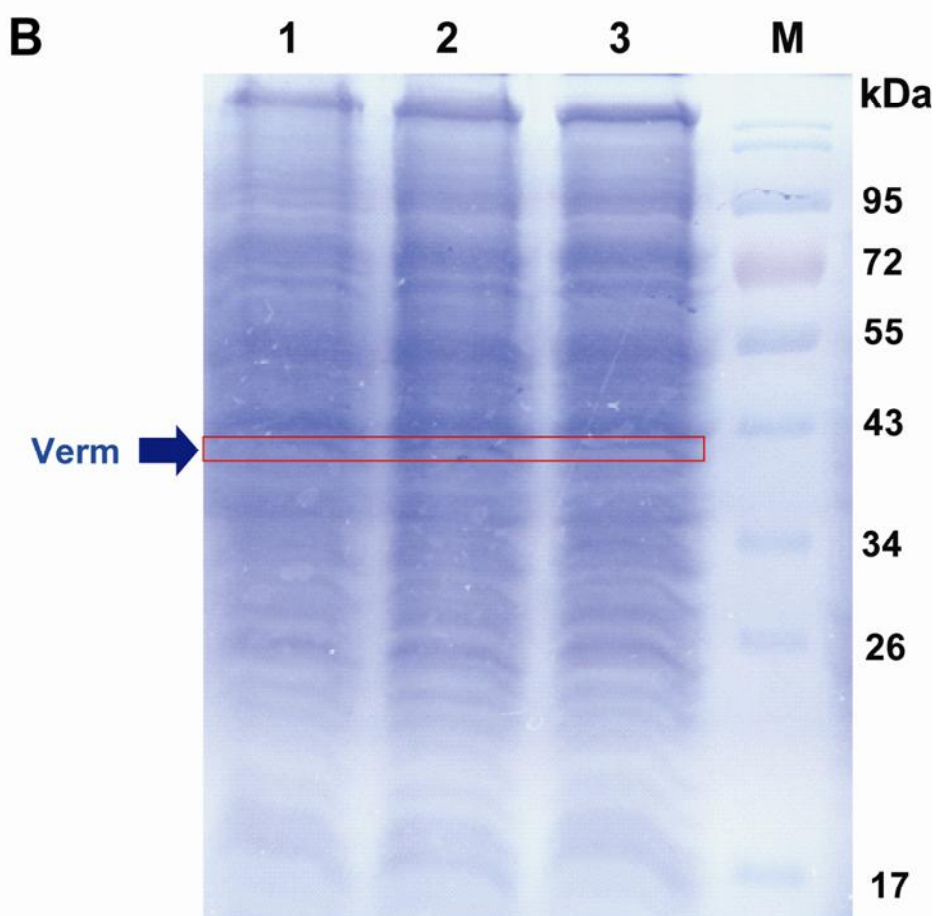

# Supplement data 2

C:\Users\apple\Desktop\MS160894\_LY1

2016/7/13 15:55:37

RT: 0.00 - 45.01

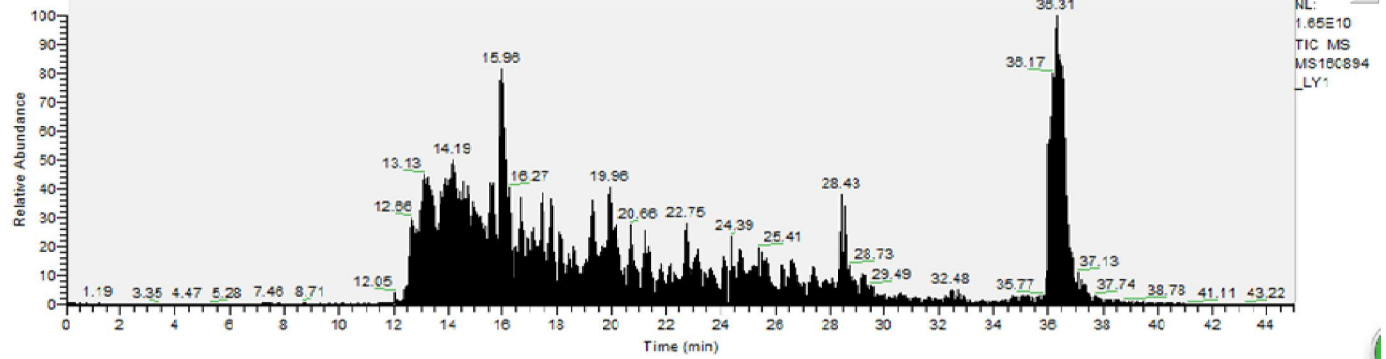

# Supplement data 3

A

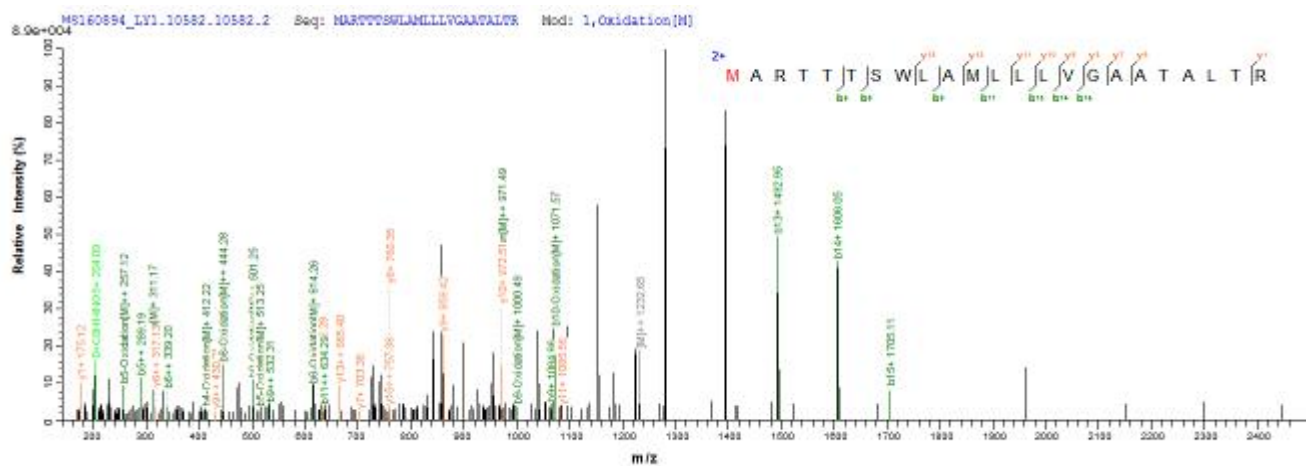

B

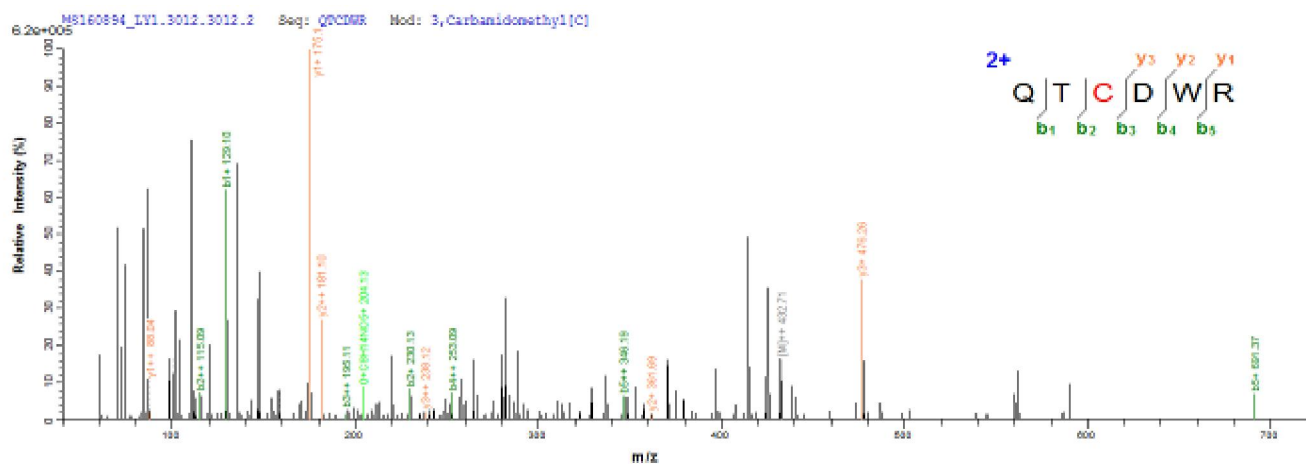

C

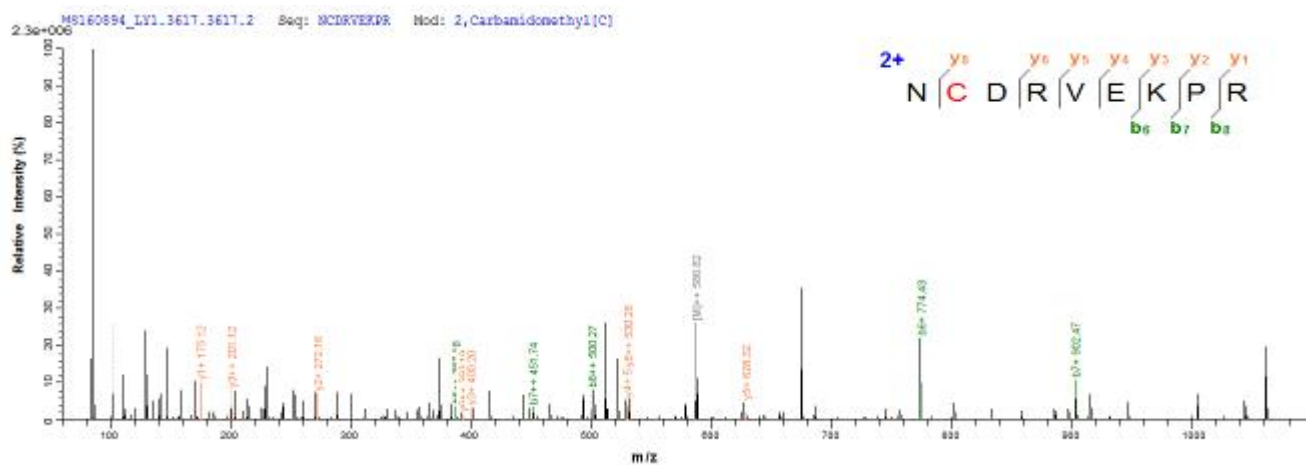

D

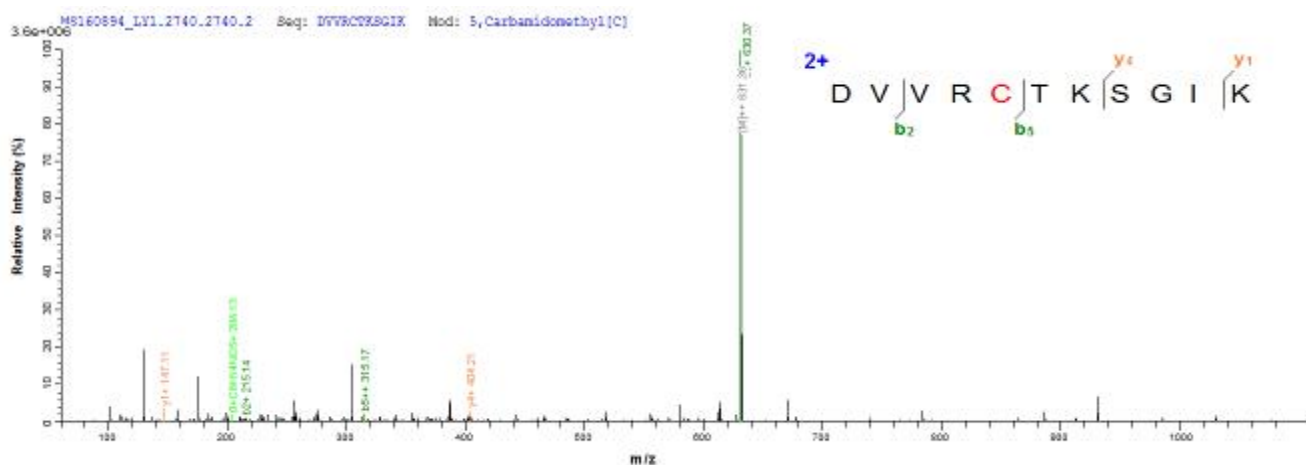

E

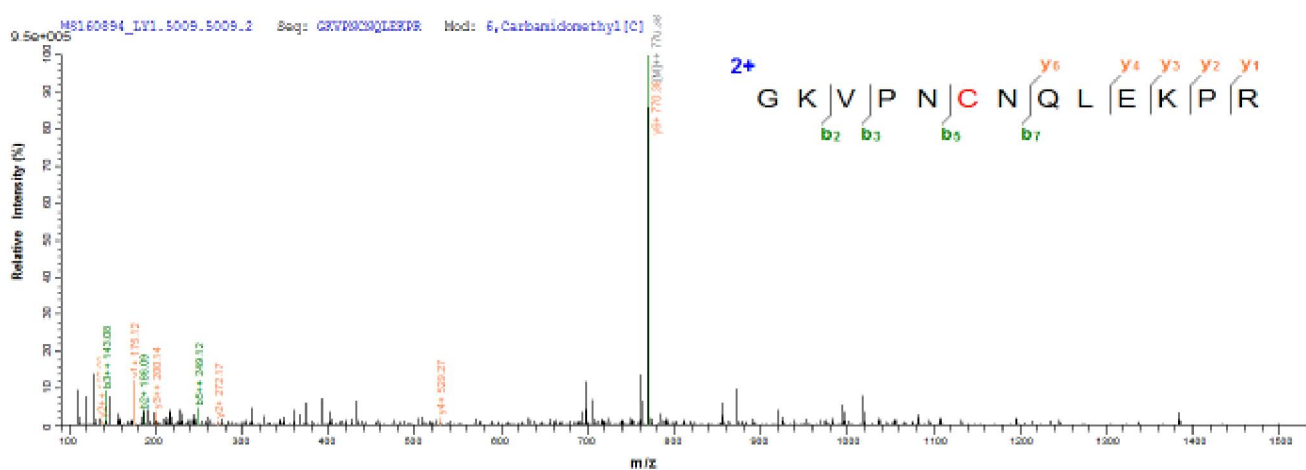

F

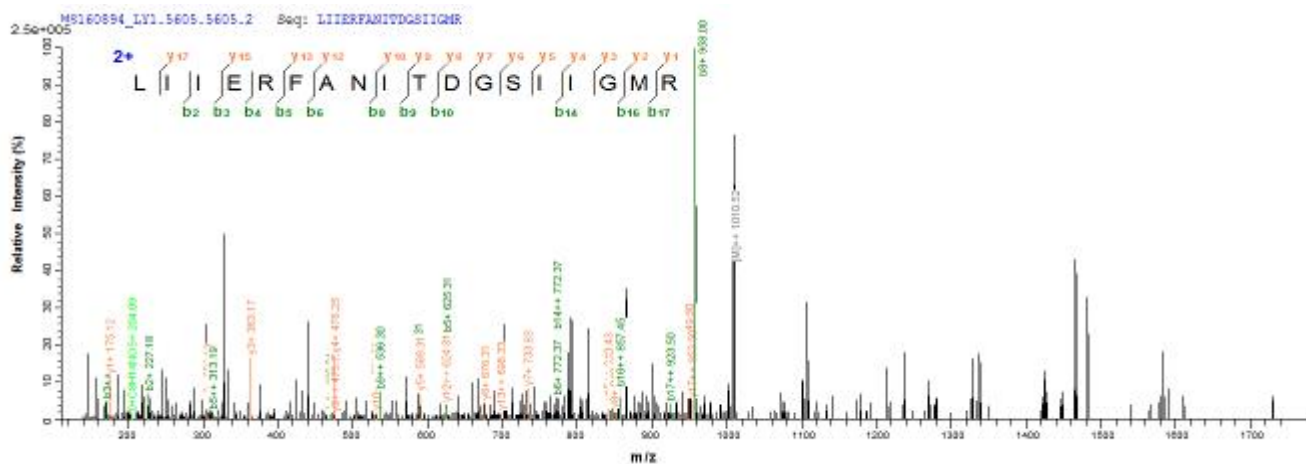

G

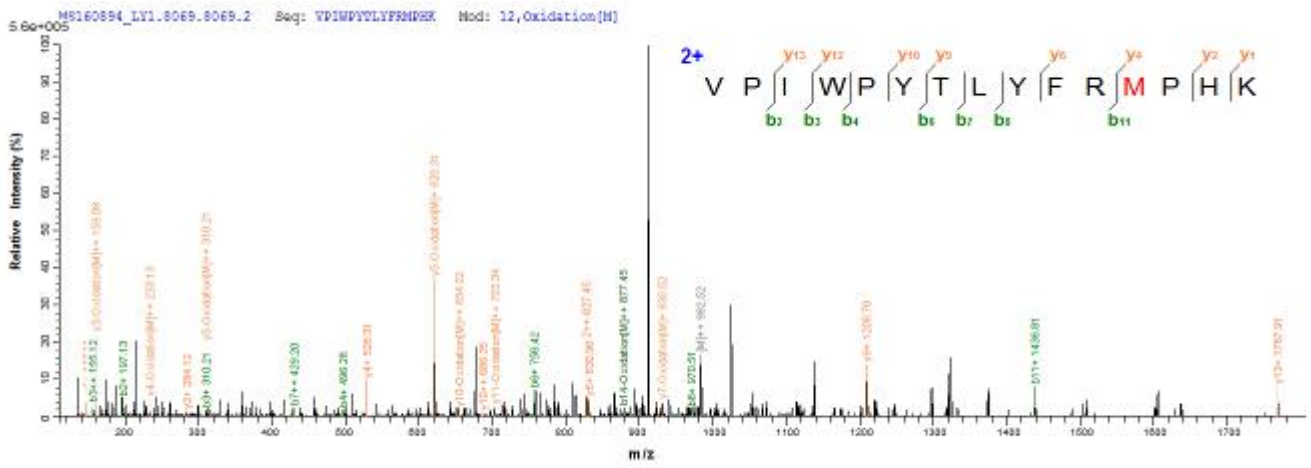

H

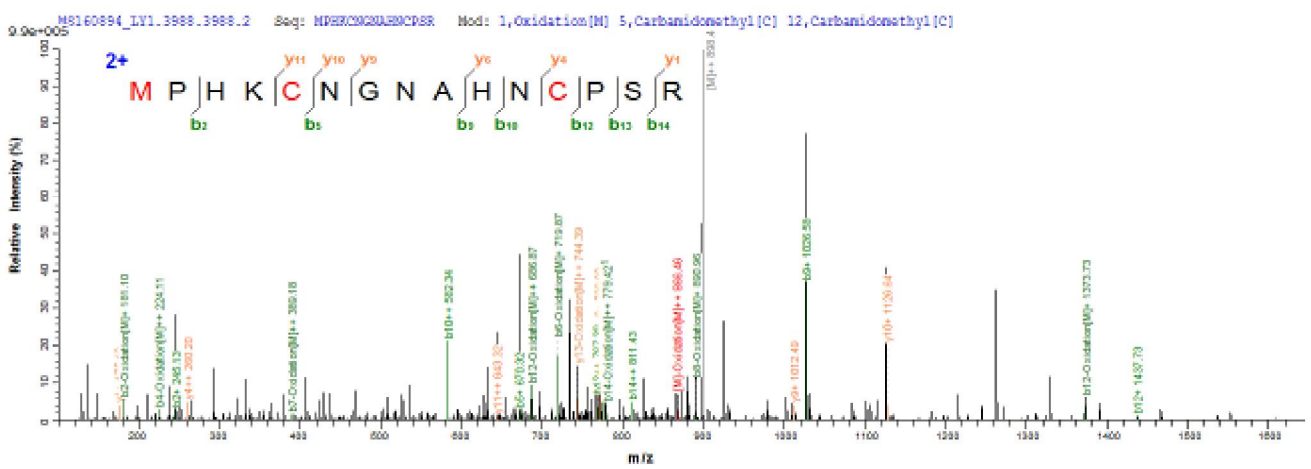

I

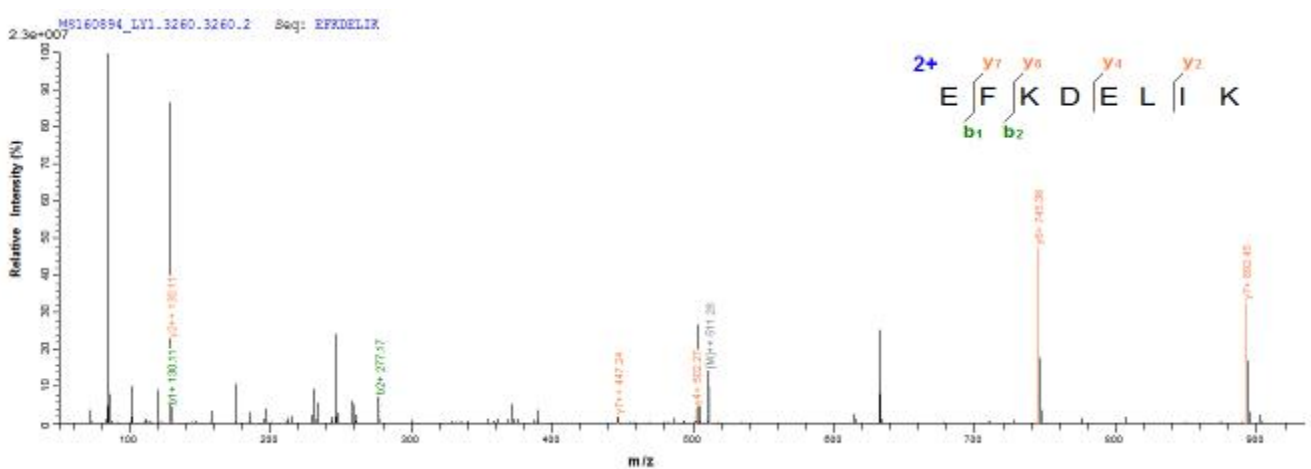

# Supplement data 4

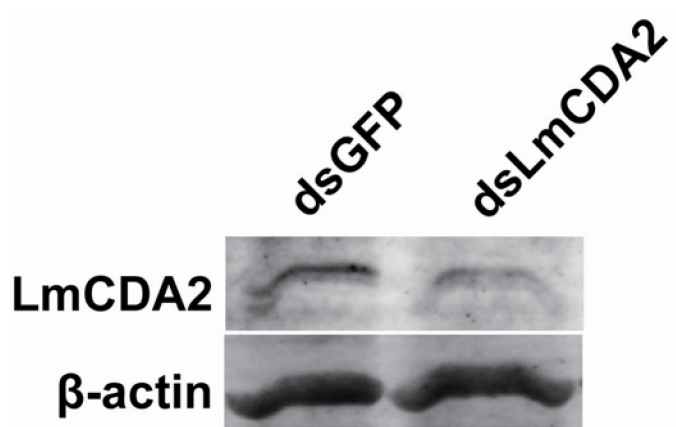

## Supplement data 5

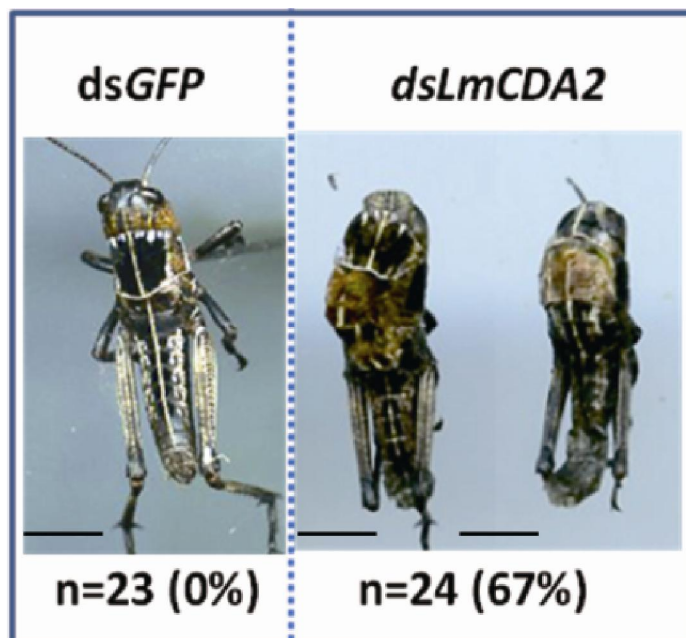

# TABLE 1

**TABLE 1 The detected sequences and modified sites**

| <b>Sequences</b>        | <b>Modification</b>                                               | <b>Specific</b> |
|-------------------------|-------------------------------------------------------------------|-----------------|
| MARTTTLWLAMLLLVGAATALTR | 1,M (Oxidation[M]                                                 | LmCDA2a/b       |
| QTCDWR                  | 3,C(Carbamidomethyl[C]                                            | LmCDA2a         |
| NCDRVEKPR               | 2,C(Carbamidomethyl[C]                                            | LmCDA2a         |
| DVVRCTKSGIK             | 5,C(Carbamidomethyl[C]                                            | LmCDA2b         |
| GKVPNCNQLKPR            | 6,C(Carbamidomethyl[C]                                            | LmCDA2b         |
| LIERFANITDGSIIIGMR      | No modification                                                   | LmCDA2a/b       |
| VPIWPYTLYFRMPHK         | 12,M(Oxidation[M]                                                 | LmCDA2a/b       |
| MPHKCNGNAHNCPSR         | 1,M(Oxidation[M]);5,C(Carbamidomethyl[C]);12,C(Carbamidomethyl[C] | LmCDA2a/b       |
| EFKDELIK                | No modification                                                   | LmCDA2a/b       |
